# Supplementary material for: The potential novel bacteriophages against multidrug-resistant Edwardsiella tarda isolates from Edwardsiellosis striped catfish
Source: Research Square preprint supplement (doi:10.21203/rs.3.rs-6583189/v1), 2025-06-16
Supplement: Supplementary file 1 [file 421bd849b0422be2431621ab.docx]

**Electronic Supplementary Material**

**The potential novel bacteriophages against**

**multidrug-resistant *Edwardsiella tarda* isolates from Edwardsiellosis striped catfish**

Trong-Tuong Ho1,2, Pham T. Cam3,4, Huynh M. Dieu1,2, Hoang T. Duc1,2, Tu Q. Vinh1,2, Tran T.B. Huy1,2, Pham D.T. My1,2, Dang T.H. Oanh5, Pham Q. Huy5, Nguyen T.N. Huyen5, Le P. Nga1,2, Nguyen Bao Quoc3, Andrew D. Millard6, Tan-Trung Nguyen7,*, Hoang A. Hoang1,2,*

1Department of Biotechnology, Faculty of Chemical Engineering, Ho Chi Minh City University of Technology (HCMUT), 268 Ly Thuong Kiet, District 10, Ho Chi Minh City, Vietnam

2Vietnam National University Ho Chi Minh City, Linh Trung Ward, Thu Duc District, Ho Chi Minh City, Vietnam

3Faculty of Biological Sciences, Nong Lam University, Ho Chi Minh City, Vietnam

4College Electro-mechanics, Construction and Agro-forestry of Central Vietnam, Binh Dinh Province, Vietnam

5College of Aquaculture and Fisheries, Can Tho University, Campus II, 3/2 St., Ninh Kieu District, Can Tho, Vietnam

6Becky Mayer Centre for Phage Research, Department of Genetics and Genome Biology, University of Leicester, University Road, Leicester, LE1 7RH, United Kingdom

7INSERM U1212 Acides nucléiques: Régulations Naturelle et Artificielle (ARNA), Institut Européen de Chimie et Biologie, Université de Bordeaux, Pessac 33607, France

*Corresponding authors:

Hoang A. Hoang, Email: [hoang.a.hoang@hcmut.edu.vn](mailto:hoang.a.hoang@hcmut.edu.vn)

Tan-Trung Nguyen, Email: [tan-trung.nguyen@u-bordeaux.fr](mailto:tan-trung.nguyen@u-bordeaux.fr)

**Table S1. Overview of 31 BLASTp best hits with terminase large subunit to use for phylogenetic analysis**

| **No.** | **Bacteriophages** | **Accession no.** |
| --- | --- | --- |
| 1 | Pseudomonas phage MR4 | [QJD54743.1](https://www.ncbi.nlm.nih.gov/protein/QJD54743.1?report=genbank&log$=prottop&blast_rank=1&RID=VP3P70BT016) |
| 2 | Pectobacterium phage PP99 | [YP_009788797.1](https://www.ncbi.nlm.nih.gov/protein/YP_009788797.1?report=genbank&log$=prottop&blast_rank=2&RID=VP3P70BT016) |
| 3 | Escherichia phage ECBP5 | [YP_009146419.1](https://www.ncbi.nlm.nih.gov/protein/YP_009146419.1?report=genbank&log$=prottop&blast_rank=3&RID=VP3P70BT016) |
| 4 | Klebsiella phage Roth32 | [XNO95108.1](https://www.ncbi.nlm.nih.gov/protein/XNO95108.1?report=genbank&log$=prottop&blast_rank=4&RID=VP3P70BT016) |
| 5 | Klebsiella phage RCIP0053 | [WPJ52799.1](https://www.ncbi.nlm.nih.gov/protein/WPJ52799.1?report=genbank&log$=prottop&blast_rank=5&RID=VP3P70BT016) |
| 6 | Klebsiella phage RCIP0089 | [WPJ55266.1](https://www.ncbi.nlm.nih.gov/protein/WPJ55266.1?report=genbank&log$=prottop&blast_rank=6&RID=VP3P70BT016) |
| 7 | Klebsiella phage vB_Kp_Z1 | [XHY09360.1](https://www.ncbi.nlm.nih.gov/protein/XHY09360.1?report=genbank&log$=prottop&blast_rank=7&RID=VP3P70BT016) |
| 8 | Pantoea phage Nufs112 | [UJH95886.1](https://www.ncbi.nlm.nih.gov/protein/UJH95886.1?report=genbank&log$=prottop&blast_rank=8&RID=VP3P70BT016) |
| 9 | Erwinia phage VL73 | [WYM31524.1](https://www.ncbi.nlm.nih.gov/protein/WYM31524.1?report=genbank&log$=prottop&blast_rank=9&RID=VP3P70BT016) |
| 10 | Sphingobacterium alkalisoli | [WP_188876216.1](https://www.ncbi.nlm.nih.gov/protein/WP_188876216.1?report=genbank&log$=prottop&blast_rank=10&RID=VP3P70BT016) |
| 11 | Klebsiella phage 6939 | [URY99180.1](https://www.ncbi.nlm.nih.gov/protein/URY99180.1?report=genbank&log$=prottop&blast_rank=11&RID=VP3P70BT016) |
| 12 | Klebsiella phage KL01 | [WNV46851.1](https://www.ncbi.nlm.nih.gov/protein/WNV46851.1?report=genbank&log$=prottop&blast_rank=12&RID=VP3P70BT016) |
| 13 | Aeromonas phage vB_AspA_Tola | [UOW66404.1](https://www.ncbi.nlm.nih.gov/protein/UOW66404.1?report=genbank&log$=prottop&blast_rank=13&RID=VP3P70BT016) |
| 14 | Aeromonas phage Aer_P220 | [UTQ78266.1](https://www.ncbi.nlm.nih.gov/protein/UTQ78266.1?report=genbank&log$=prottop&blast_rank=14&RID=VP3P70BT016) |
| 15 | Marinomonas phage CPP1m | [YP_009790032.1](https://www.ncbi.nlm.nih.gov/protein/YP_009790032.1?report=genbank&log$=prottop&blast_rank=15&RID=VP3P70BT016) |
| 16 | Marinomonas phage CB5A | [YP_009791136.1](https://www.ncbi.nlm.nih.gov/protein/YP_009791136.1?report=genbank&log$=prottop&blast_rank=16&RID=VP3P70BT016) |
| 17 | Vibrio phage VP-HS15 | [QHB42729.1](https://www.ncbi.nlm.nih.gov/protein/QHB42729.1?report=genbank&log$=prottop&blast_rank=17&RID=VP3P70BT016) |
| 18 | Vibrio phage Vp670 | [YP_009788811.1](https://www.ncbi.nlm.nih.gov/protein/YP_009788811.1?report=genbank&log$=prottop&blast_rank=18&RID=VP3P70BT016) |
| 19 | Vibrio phage vB_ValA_R15Z | [WLJ89318.1](https://www.ncbi.nlm.nih.gov/protein/WLJ89318.1?report=genbank&log$=prottop&blast_rank=19&RID=VP3P70BT016) |
| 20 | Vibrio phage phi-A318 | [YP_009110751.1](https://www.ncbi.nlm.nih.gov/protein/YP_009110751.1?report=genbank&log$=prottop&blast_rank=20&RID=VP3P70BT016) |
| 21 | Vibrio phage vB_VpaP_MGD2 | [QDF45948.1](https://www.ncbi.nlm.nih.gov/protein/QDF45948.1?report=genbank&log$=prottop&blast_rank=21&RID=VP3P70BT016) |
| 22 | Vibrio phage vB_VcaP_R25D | [XNL98485.1](https://www.ncbi.nlm.nih.gov/protein/XNL98485.1?report=genbank&log$=prottop&blast_rank=22&RID=VP3P70BT016) |
| 23 | Vibrio phage vB_VcaP_R24D | [XNL98535.1](https://www.ncbi.nlm.nih.gov/protein/XNL98535.1?report=genbank&log$=prottop&blast_rank=23&RID=VP3P70BT016) |
| 24 | Vibrio phage Vc1 | [YP_009784716.1](https://www.ncbi.nlm.nih.gov/protein/YP_009784716.1?report=genbank&log$=prottop&blast_rank=24&RID=VP3P70BT016) |
| 25 | Aeromonas phage HJG | [QBJ01086.1](https://www.ncbi.nlm.nih.gov/protein/QBJ01086.1?report=genbank&log$=prottop&blast_rank=25&RID=VP3P70BT016) |
| 26 | Pseudomonas phage Alpheus | [YP_009800684.1](https://www.ncbi.nlm.nih.gov/protein/YP_009800684.1?report=genbank&log$=prottop&blast_rank=26&RID=VP3P70BT016) |
| 27 | Aeromonas phage MJG | [QBJ01058.1](https://www.ncbi.nlm.nih.gov/protein/QBJ01058.1?report=genbank&log$=prottop&blast_rank=27&RID=VP3P70BT016) |
| 28 | Pseudomonas phage Achelous | [YP_009800637.1](https://www.ncbi.nlm.nih.gov/protein/YP_009800637.1?report=genbank&log$=prottop&blast_rank=28&RID=VP3P70BT016) |
| 29 | Pseudomonas phage Ulina01 | [XAI69907.1](https://www.ncbi.nlm.nih.gov/protein/XAI69907.1?report=genbank&log$=prottop&blast_rank=29&RID=VP3P70BT016) |
| 30 | Pseudomonas phage uligo | [YP_009795791.1](https://www.ncbi.nlm.nih.gov/protein/YP_009795791.1?report=genbank&log$=prottop&blast_rank=30&RID=VP3P70BT016) |
| 31 | Escherichia phage T7 | UJQ71180.1 |

**Table S2. Genome similarity index computed by ViPTreeGen software for WAG25P1, WCT72P1, and DT115P1 to generate phylogenetic tree**

| **Accession number** | **Phage** | **Genome similarity score** | | |
| --- | --- | --- | --- | --- |
| **WAG25P1** | **WCT72P1** | **DT115P1** |
| PV165918 | vB_EtA_DT115P1 | 0.9743 | 0.973 | 1 |
| PV165919 | vB_EtA_WAG25P1 | 1 | 0.9689 | 0.9743 |
| PV165920 | vB_EtA_WCT72P1 | 0.9689 | 1 | 0.973 |
| OR532847.1 | *Klebsiella* phage RCIP0053 | 0.6758 | 0.6723 | 0.6857 |
| OR532883.1 | *Klebsiella* phage RCIP0089 | 0.6786 | 0.688 | 0.682 |
| NC_047802 | *Pectobacterium* phage PP99 | 0.6747 | 0.6778 | 0.6772 |
| NC_027330 | *Escherichia* phage ECBP5 | 0.6757 | 0.6791 | 0.6756 |
| MT104467.1 | *Pseudomonas* phage MR4 | 0.6683 | 0.664 | 0.6668 |
| NC_047803 | *Vibrio* phage Vp670 | 0.2432 | 0.2458 | 0.2399 |
| NC_025822 | *Vibrio* phage phi-A318 | 0.2404 | 0.2429 | 0.2378 |
| NC_047746 | *Vibrio* phage Vc1 | 0.2367 | 0.238 | 0.2335 |
| NC_047957 | *Pseudomonas* phage Alpheus | 0.226 | 0.2271 | 0.2251 |
| MK455769 | *Aeromonas* phage MJG | 0.2209 | 0.2261 | 0.2227 |
| NC_047955 | *Pseudomonas* phage Nerthus | 0.2231 | 0.2244 | 0.2218 |
| NC_047821 | *Marinomonas* phage CPP1m | 0.2244 | 0.228 | 0.2217 |
| NC_047894 | *Pseudomonas* phage uligo | 0.2211 | 0.2236 | 0.2187 |
| NC_047903 | *Vibrio* phage VEN | 0.2132 | 0.2174 | 0.2137 |
| NC_047954 | *Pseudomonas* phage Njord | 0.2164 | 0.2185 | 0.2129 |
| NC_019926 | *Erwinia* phage phiEa100 | 0.202 | 0.2021 | 0.2034 |
| NC_009014 | *Erwinia* phage Era103 | 0.2016 | 0.2038 | 0.203 |
| NC_048064 | *Escherichia* phage LL11 | 0.205 | 0.2068 | 0.2004 |
| OP413830 | *Klebsiella* phage pKV-BS375-3.1 | 0.1971 | 0.198 | 0.1955 |
| NC_030937 | *Xanthomonas* phage f30-Xaj | 0.0453 | 0.043 | 0.0432 |
| NC_007636 | *Escherichia* phage K1F | 0.0397 | 0.0312 | 0.0392 |
| NC_022987 | *Xylella* phage Prado | 0.0408 | 0.0412 | 0.0389 |
| NC_029092 | *Caulobacter* phage Percy | 0.0413 | 0.0396 | 0.0386 |
| NC_048063 | *Escherichia* phage LL2 | 0.0398 | 0.0354 | 0.0385 |
| NC_031092 | *Citrobacter* phage SH2 | 0.0403 | 0.0365 | 0.0384 |
| NC_015271 | *Salmonella* phage Vi06 | 0.0383 | 0.0365 | 0.0378 |
| NC_019528 | *Aeromonas* phage phiAS7 | 0.0333 | 0.0329 | 0.0373 |
| NC_047966 | *Aeromonas* phage 25AhydR2PP | 0.0319 | 0.0321 | 0.0371 |
| NC_047866 | *Aeromonas* phage Ahp1 | 0.0325 | 0.032 | 0.0353 |
| NC_028850 | *Yersinia* phage vB_YenP_ISAO8 | 0.0364 | 0.0369 | 0.0353 |
| NC_011534 | *Kluyvera* phage Kvp1 | 0.0279 | 0.0304 | 0.0288 |
| NC_048078 | *Escherichia* phage N30 | 0.0291 | 0.0293 | 0.0287 |
| NC_022091 | *Pseudomonas* phage MPK7 | 0.0288 | 0.0287 | 0.0283 |
| NC_026602 | *Pseudomonas* phage vB_PaeP_PAO1_Ab05 | 0.0287 | 0.0287 | 0.0283 |
| MF754111.1 | *Vibrio* phage vB_VpaP_KF1 | 0.0281 | 0.0272 | 0.0277 |
| NC_008694 | *Yersinia* phage Berlin | 0.0281 | 0.0262 | 0.0277 |
| NC_047849 | *Klebsiella* phage AltoGao | 0.0267 | 0.0263 | 0.0276 |
| NC_025418 | *Klebsiella* phage NTUH-K2044-K1-1 | 0.0277 | 0.0265 | 0.0274 |
| NC_013638 | *Pseudomonas* phage phi-2 | 0.0288 | 0.0278 | 0.0273 |
| NC_047890 | *Escherichia* phage PGT2 | 0.0285 | 0.0287 | 0.026 |
| OL770365 | *Aeromonas* phage BUCT696 | 0.002 | 0.0043 | 0.0042 |

**Table S3. Summary of genomic features of *E. tarda* bacteriophages**

| **Genome feature** | **vB_EtA_WAG25P1** | **vB_EtA_WCT72P1** | **vB_EtA_DT115P1** |
| --- | --- | --- | --- |
| Genome type | Linear dsDNA | Linear dsDNA | Linear dsDNA |
| Genome length (bp) | 43999 | 43508 | 44166 |
| G+C content (%) | 47 | 47 | 47 |
| Coding density (%) | 93.86 | 93.69 | 92.97 |
| **Coding sequence (CDS)** | 64 | 60 | 62 |
| DNA, RNA and nucleotide metabolism | 12 | 11 | 11 |
| Phage capsid and packaging | 10 | 10 | 10 |
| Integration and excision | 0 | 0 | 0 |
| Phage lysis | 3 | 3 | 3 |
| Moron, auxiliary metabolic gene | 0 | 0 | 0 |
| Another enzyme | 2 | 2 | 2 |
| Phage tail | 3 | 3 | 3 |
| Transcription regulation | 0 | 0 | 0 |
| Unknown function | 34 | 31 | 33 |
| tRNAs | 0 | 0 | 0 |
| CRISPRs | 0 | 0 | 0 |
| tmRNAs | 0 | 0 | 0 |
| VFDB Virulence Factors | 0 | 0 | 0 |
| CARD AMR Genes | 0 | 0 | 0 |

**Table S4. Overview of isolated *E. tarda* bacteriophages**

| Name | ICTV Taxonomy | Bacterial Host | Source | Fish | Country/Year | Accession |
| --- | --- | --- | --- | --- | --- | --- |
| *E. tarda* phage GF-2 | *Caudoviricetes* class, unclassified family | *Edwardsiella tarda* | Tissue Homogenates | *Paralichthys olivaceus* | Japan/2015 | AP014629 |
| *E. tarda* phage ETP-1 | - | *Edwardsiella tarda* | Marine water | *Danio rerio* | Korea/2019 | - |
| *E. tarda* phage vB_EtaM_ET‑ABTNL‑9 | - | *Edwardsiella tarda* | Waste water | *Scophthalmus maximus* L. | China/2020 | MN399336 |
| *E. tarda* phage KF-1 | *Caudoviricetes* class, unclassified family | *Edwardsiella tarda* | Kidney tissue | *Paralichthys olivaceus* | Japan/2013 | AB757800 |
| *E. tarda* phage IW-1 | - | *Edwardsiella tarda* | Seawater | *Paralichthys olivaceus* | Japan/2013 | AB757801 |
| *E. tarda* phage pEt-SU | *Caudoviricetes* class, *Chimalliviridae* family | *Edwardsiella tarda* | Freshwater | *Paralichthys olivaceus* | Korea/2019 | MK689364 |
| *E. tarda* phage vB_EpM_ZHS | - | *Edwardsiella piscicida* | Sewage | *Scophthalmus maximus* | China/2022 | OM621816 |
| *E. tarda* phage vB_EpM_ZHX | - | *Edwardsiella piscicida* | Sewage | *Scophthalmus maximus* | China/2022 | OL959999 |
| *E. tarda* phage EPP-1 | Caudoviricetes class, unclassified family | *Edwardsiella piscicida* | Wastewater | *Danio rerio* | China/2024 | OQ910326 |
